# Supplementary material
Source: PubMed Central journal article supplement (PMC6754315)
Supplement: NIHMS1521318-supplement-1.pdf [file NIHMS1521318-supplement-1.pdf]

**Supplementary Table 1: Brain regions excluded from T2 values analysis**

| <b>Excluded regions</b>               |
|---------------------------------------|
| alveus of the hippocampus             |
| anterior commissure                   |
| ascending fibers of the facial nerve  |
| brachium of the superior colliculus   |
| central canal                         |
| commissural stria terminalis          |
| commissure of the inferior colliculus |
| commissure of the superior colliculus |
| descending corticofugal pathways      |
| entopeduncular nucleus                |
| facial nerve                          |
| fasciculus retroflexus                |
| fasciola cinereum                     |
| frontal association cortex            |
| genu of the facial nerve              |
| granule cell level of the cerebellum  |
| habenular commissure                  |
| inferior cerebellar peduncle          |
| inferior olive                        |
| inner ear                             |
| interpeduncular nucleus               |
| medial lemniscus decussation          |
| middle cerebellar peduncle            |
| molecular layer of the cerebellum     |
| nucleus of the stria medullaris       |
| olfactory bulb                        |
| optic nerve                           |
| optic tract and optic chiasm          |
| periventricular gray                  |
| pineal gland                          |
| pontine nuclei                        |
| posterior commissure                  |
| presubiculum                          |
| pyramidal decussation                 |
| spinal cord                           |
| spinal trigeminal nucleus             |
| spinal trigeminal tract               |
| subthalamic nucleus                   |
| supraoptic decussation                |
| transverse fibers of the pons         |
| ventral hippocampal commissure        |
